# Supplementary material for: Weakly Circadian Cells Improve Resynchrony
Source: PLOS journal article supplement (doi:10.1371/journal.pcbi.1002787), 2012-11-29
Supplement: S8 (10.1371/journal.pcbi.1002787.s008) [file journal.pcbi.1002787.s008]

301 Moved Permanently

# Moved Permanently

The document has moved here.

---

Apache Server at www.ploscompbiol.org Port 80
